# Supplementary material for: Clinical implication of voltage-dependent anion channel 1 in uterine cervical cancer and its action on cervical cancer cells
Source: PubMed Central journal article supplement (PMC4826200; doi:10.18632/oncotarget.6704), 2015-12-21
Supplement: oncotarget-07-4210-s001.pdf [file oncotarget-07-4210-s001.pdf]

## SUPPLEMENTARY FIGURES

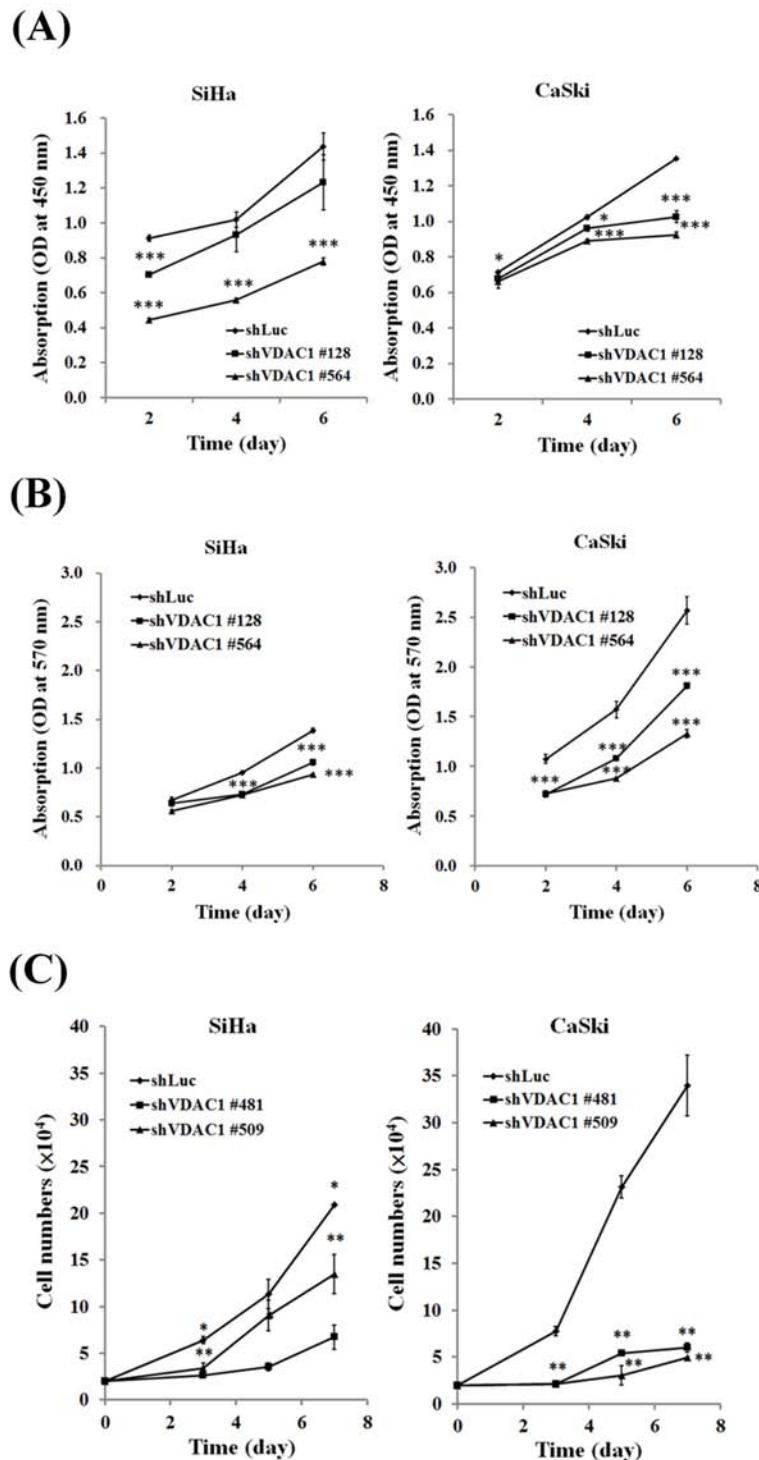

**Supplementary Figure S1: Effects of shVDAC1 on cell proliferation and viability in SiHa and CaSki cells.** SiHa (left) and CaSki (right) shVDAC1 #128, #564 or shLuc cells ( $5 \times 10^3$ /well) were seeded in a 96 well plate and analyzed by **A.** Cell Counting Kit-8 (CCK-8) assay and **B.** MTT [3-(4,5-dimethylthiazol-2-yl)-2,5-diphenyltetrazolium bromide] assay every 48 h under monolayer culture conditions. Each growth curve represents the mean $\pm$ SD of triplicate experiments. **C.** SiHa and CaSki shVDAC1 #481, #509 or shLuc cells ( $2 \times 10^4$  cells/6cm dish) were seeded and analyzed by counting cell numbers at 3, 5 and 7 days. All values are means  $\pm$  SD from at least three independent experiments. \* $p < 0.05$ , \*\* $p < 0.01$ , \*\*\* $p < 0.001$ .

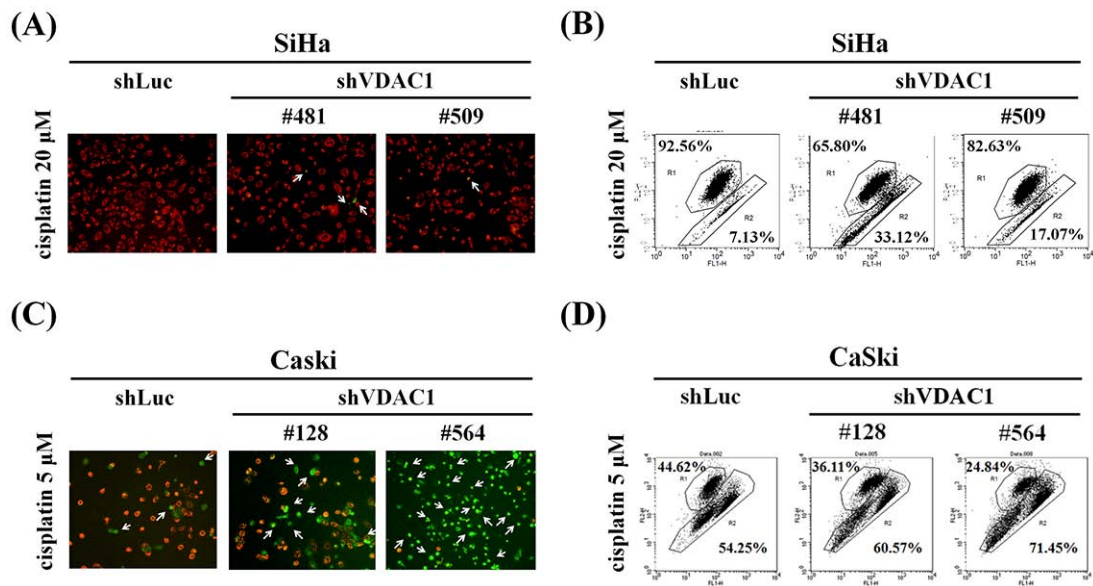

**Supplementary Figure S2: Effects of shVDAC1 on MMP in SiHa and CaSki cells.** A. SiHa shVDAC1 #481 and #509 and C. CaSki shVDAC1 #128, #564 and shLuc cells were treated with cisplatin (5 or 20  $\mu$ M) for 48 hours. Representative images of SiHa shVDAC1 #481 and #509 and CaSki shVDAC1 #128, #564 and shLuc cells stained with JC-1 (magnification,  $\times 100$ ). White arrows indicate green fluorescence (monomeric JC-1). B. SiHa shVDAC1 #481 and #509 and D. CaSki shVDAC1 #128, #564 and shLuc cells were treated with cisplatin (5 or 20  $\mu$ M) for 48 hours. Changes in MMP were assessed by the intensity of red fluorescence (R1) and green fluorescence (R2) of JC-1. VDAC1, voltage-dependent anion channel 1; MMP, mitochondrial membrane potential.

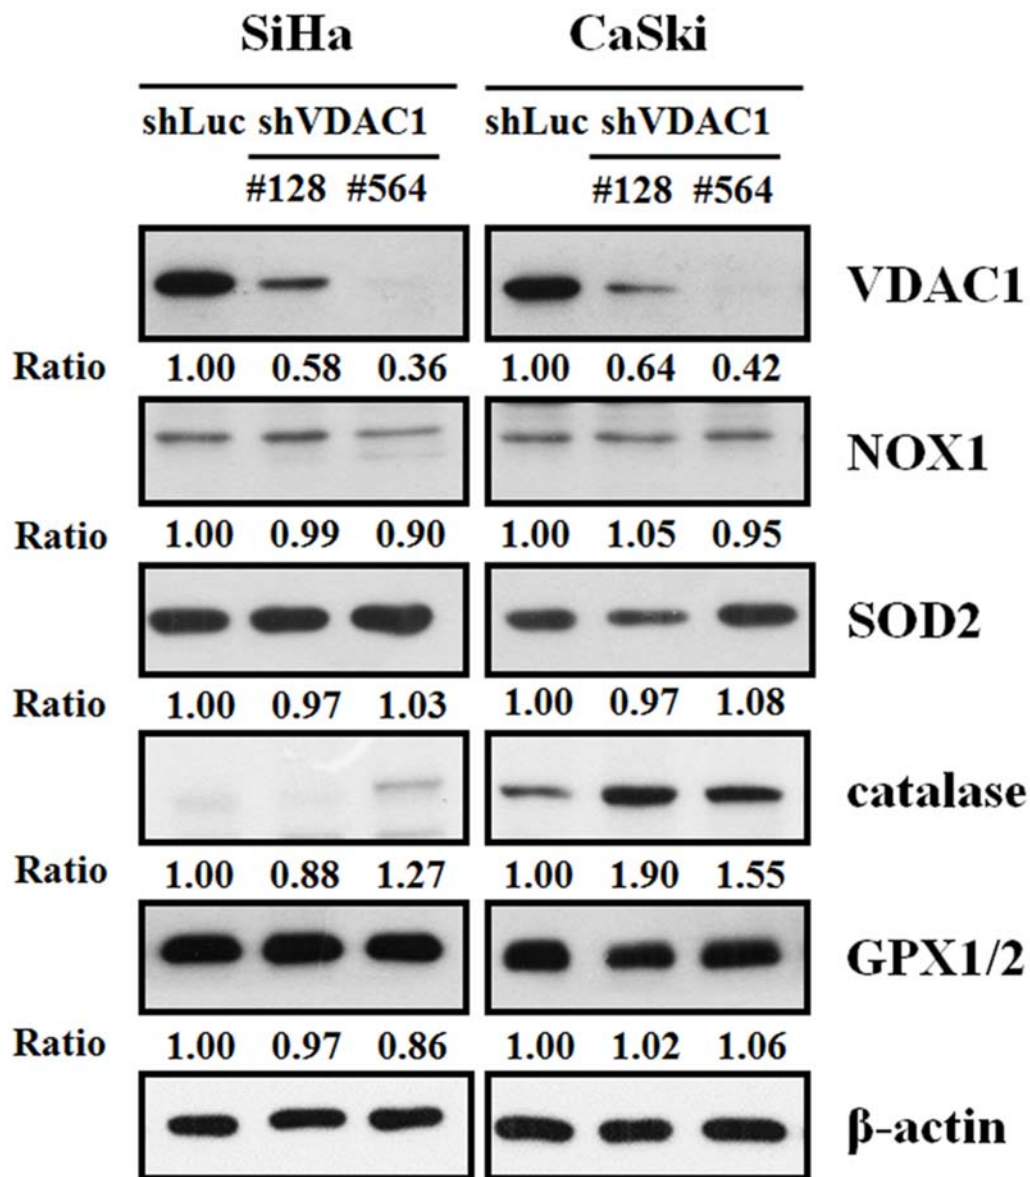

**Supplementary Figure S3: Effects of shVDAC1 on the metabolizing enzymes of reactive oxygen species.** VDAC1 (voltage-dependent anion channel 1), NOX1 (NADPH oxidase 1), SOD2 (superoxide dismutase 2), catalase and GPX1/2 (glutathione peroxidase 1/2) protein levels were determined on Western blot using protein lysates from parental and VDAC1-knocked down cervical cancer cells.  $\beta$ -actin was used as the internal control. The relative ratios of VDAC1/ $\beta$ -actin, NOX1/ $\beta$ -actin, SOD2/ $\beta$ -actin, catalase/ $\beta$ -actin and GPX1/2/ $\beta$ -actin are shown.
